# Supplementary material for: Label-free visualization and quantification of the drug-type-dependent response of tumor spheroids by dynamic optical coherence tomography
Source: PubMed Central journal article supplement (PMC10858208; doi:10.1038/s41598-024-53171-4), 2024-02-09
Supplement: 41598_2024_53171_MOESM1_ESM.pdf [file 41598_2024_53171_MOESM1_ESM.pdf]

## Supplementary material

### Label-free visualization and quantification of the drug-type-dependent response of tumor spheroids by dynamic optical coherence tomography

Ibrahim Abd El-Sadek<sup>1,2</sup>, Rion Morishita<sup>1</sup>, Tomoko Mori<sup>3</sup>, Shuichi Makita<sup>1</sup>, Pradipta Mukherjee<sup>1</sup>, Satoshi Matsusaka<sup>3</sup>, and Yoshiaki Yasuno<sup>1</sup>

<sup>1</sup>Computational Optics Group, University of Tsukuba, Tsukuba, Ibaraki 305-8573, Japan

<sup>2</sup>Department of Physics, Faculty of Science, Damietta University, New Damietta City, 34517, Damietta, Egypt

<sup>3</sup>Clinical Research and Regional Innovation, Faculty of Medicine, University of Tsukuba, Ibaraki 305-8575, Japan

In this supplementary material, we provide nine figures. Figures S1, S4, and S7 present the cross-sectional OCT intensity, LIV, and OCDS<sub>i</sub> images extracted at the locations of the white arrows in the en face images presented in Figs. 1, 3, and 5 of the main manuscript. The cross-sectional images show tendencies similar to those of the en face images. Figures S2 and S3 present the results for two additional spheroids obtained under each treatment condition of the control and TAM. Figures S5 and S6 present the results for two additional spheroids obtained under each treatment condition of PTX, and Figs. S8 and S9 present the results for additional spheroids treated with DOX. The additional results are similar to those presented in the main manuscript. The results of control and TAM- treated, PTX- treated, and DOX-treated spheroids on TD-3 and TD-6 (Figs. S3, S6, and S9, respectively) were recently published as a conference proceeding <sup>1</sup>.

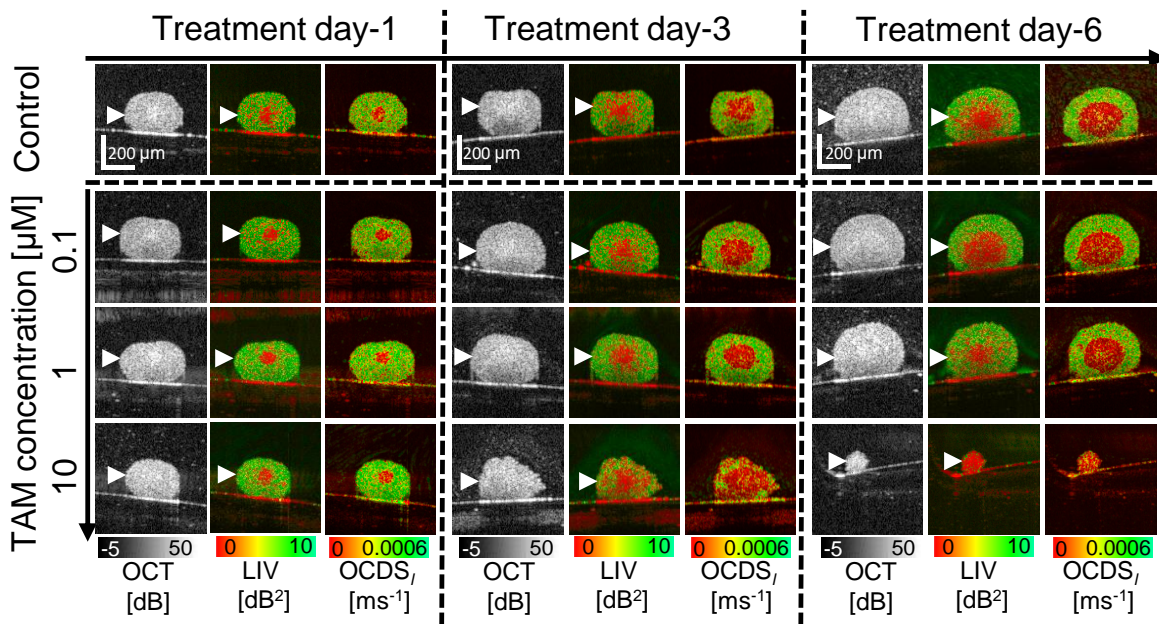

**Figure S1:** Cross-sectional OCT, LIV, and OCDS<sub>i</sub> images of the control and TAM-treated MCF-7 spheroids. The images are extracted at the white arrow head locations of Fig. 1 in the main manuscript.

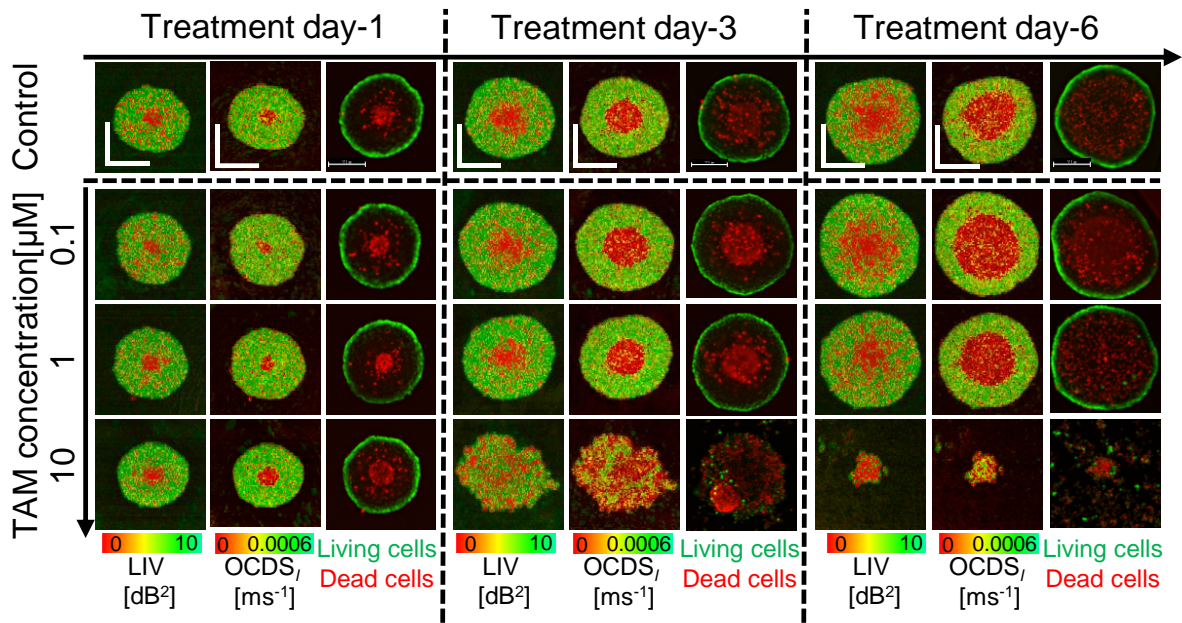

**Figure S2:** *En face* D-OCT and fluorescence images of additional control and TAM-treated MCF-7 spheroids measured under each treatment condition. The results are similar to those presented in Fig. 1 of the main manuscript. Scale bars represent 200  $\mu\text{m}$ .

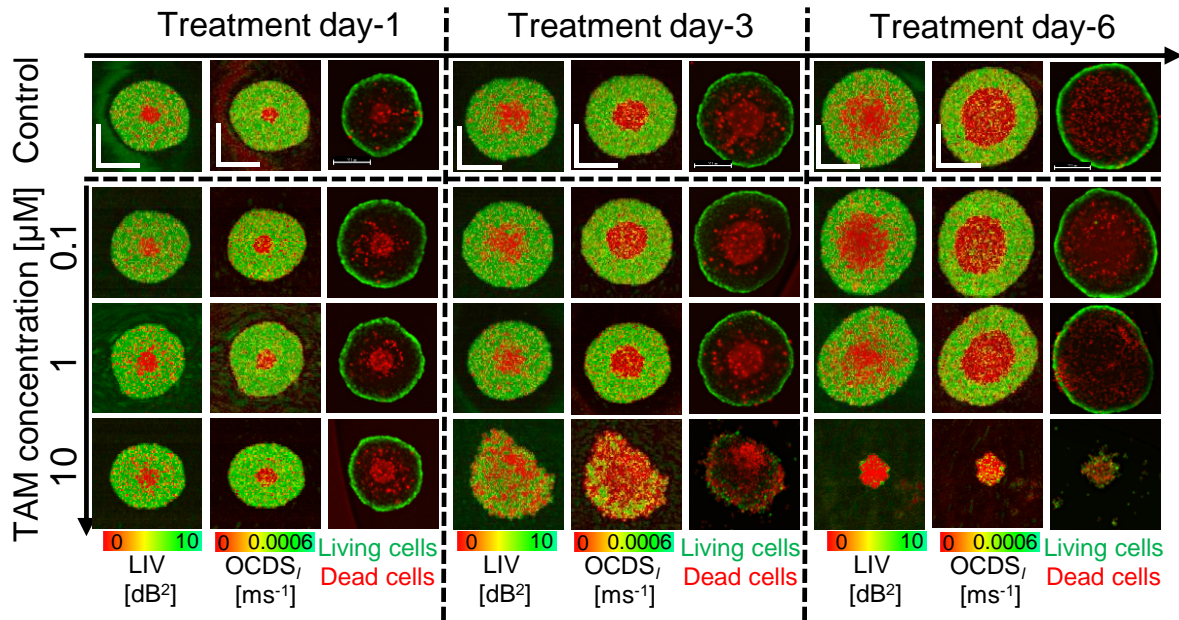

**Figure S3:** *En face* D-OCT and fluorescence images of another control and TAM-treated MCF-7 spheroids measured under each treatment condition. The results are similar to those presented in Fig. 1 of the main manuscript. Scale bars represent 200  $\mu\text{m}$ .

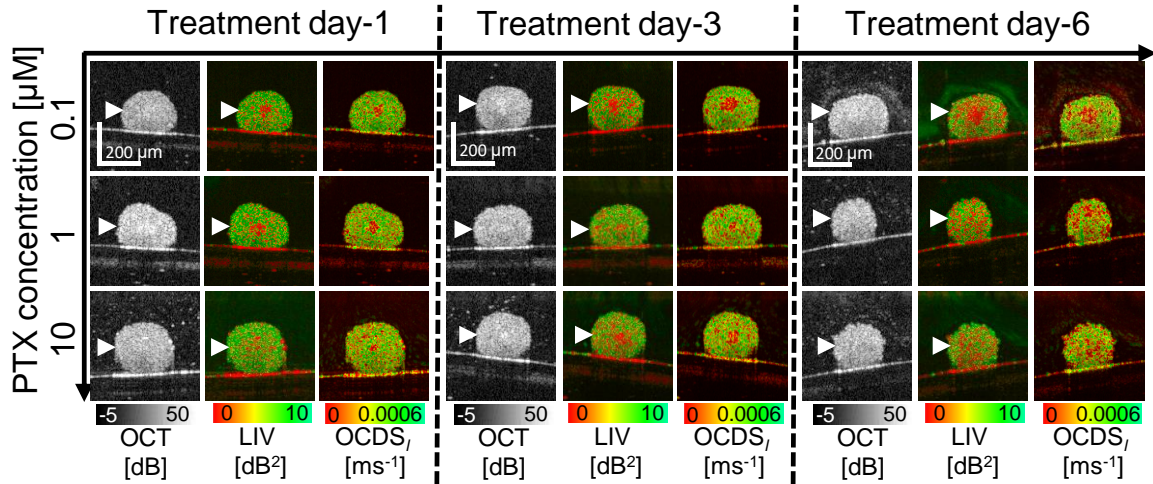

**Figure S4:** Cross-sectional OCT, LIV, and  $OCDS_I$  images of the PTX-treated MCF-7 spheroids. The images are extracted at the white arrow head locations of Fig. 3 in the main manuscript.

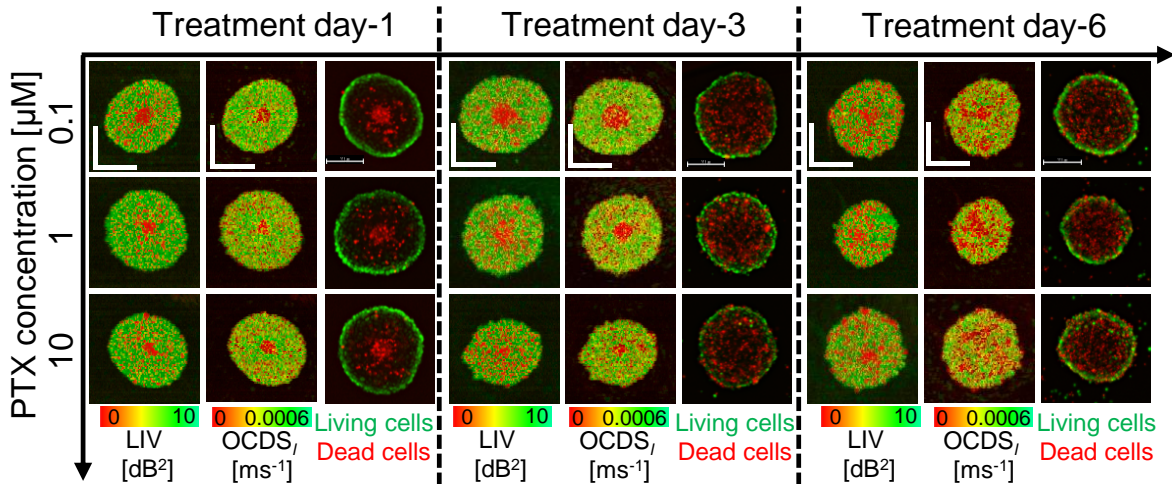

**Figure S5:** *En face* D-OCT and fluorescence images of additional PTX-treated MCF-7 spheroids measured under each treatment condition. The results are similar to those presented in Fig. 3 of the main manuscript. Scale bars represent 200  $\mu\text{m}$ .

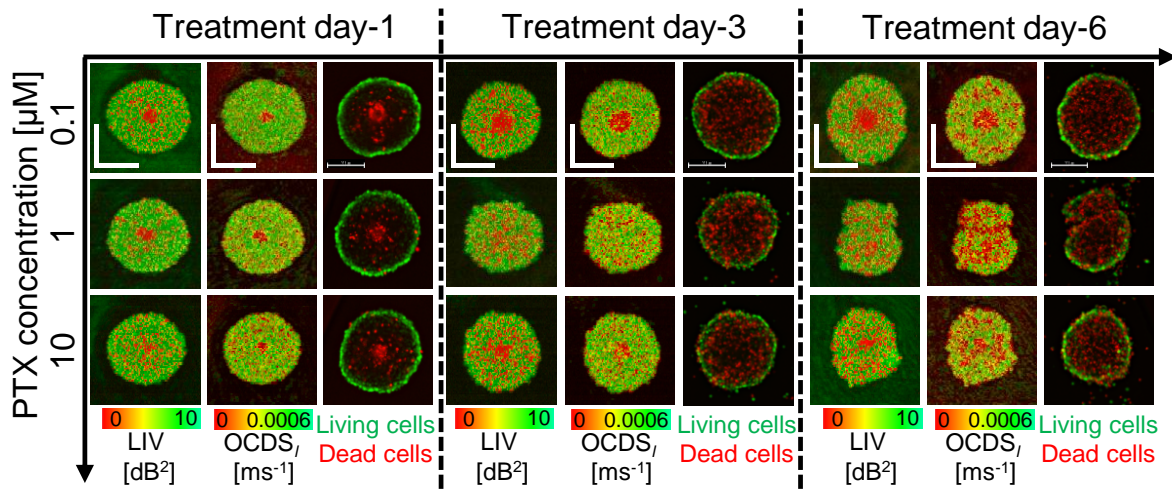

**Figure S6:** *En face* D-OCT and fluorescence images of another PTX-treated MCF-7 spheroids measure under each treatment condition. The results are similar to those presented in Fig. 3 of the main manuscript. Scale bars represent 200  $\mu\text{m}$ .

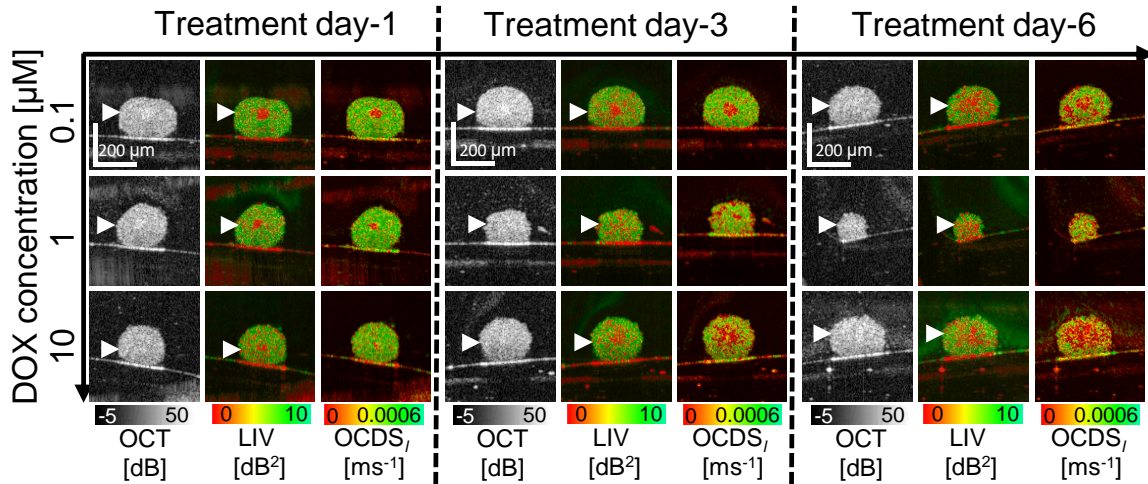

**Figure S7:** Cross-sectional OCT, LIV, and OCDS<sub>I</sub> images of the DOX-treated MCF-7 spheroids. The images are extracted at the white arrow head locations of Fig. 5 in the main manuscript.

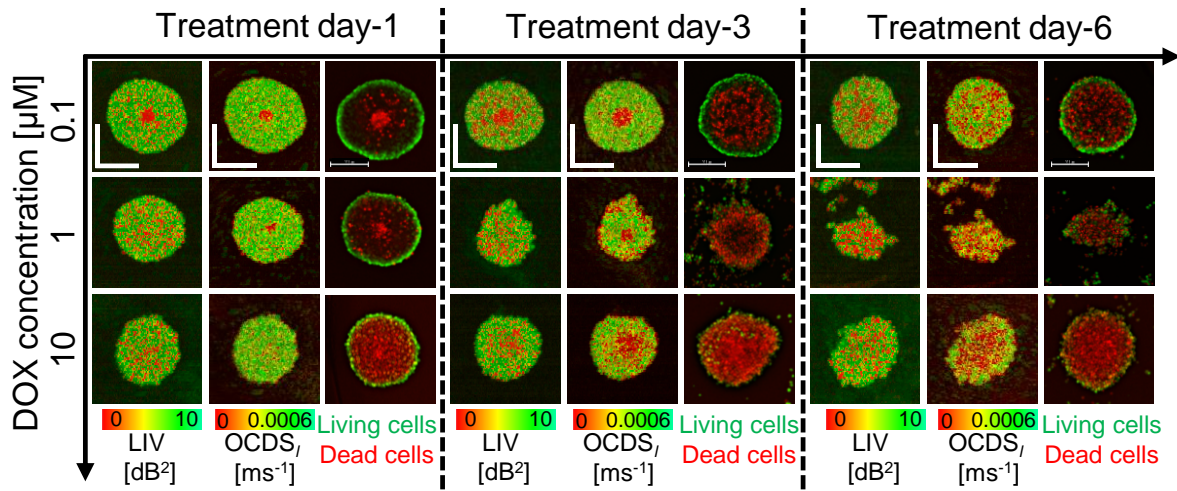

**Figure S8:** *En face* D-OCT and fluorescence images of additional DOX-treated MCF-7 spheroids measured under each treatment condition. The results are similar to those presented in Fig. 5 of the main manuscript. Scale bars represent 200  $\mu\text{m}$ .

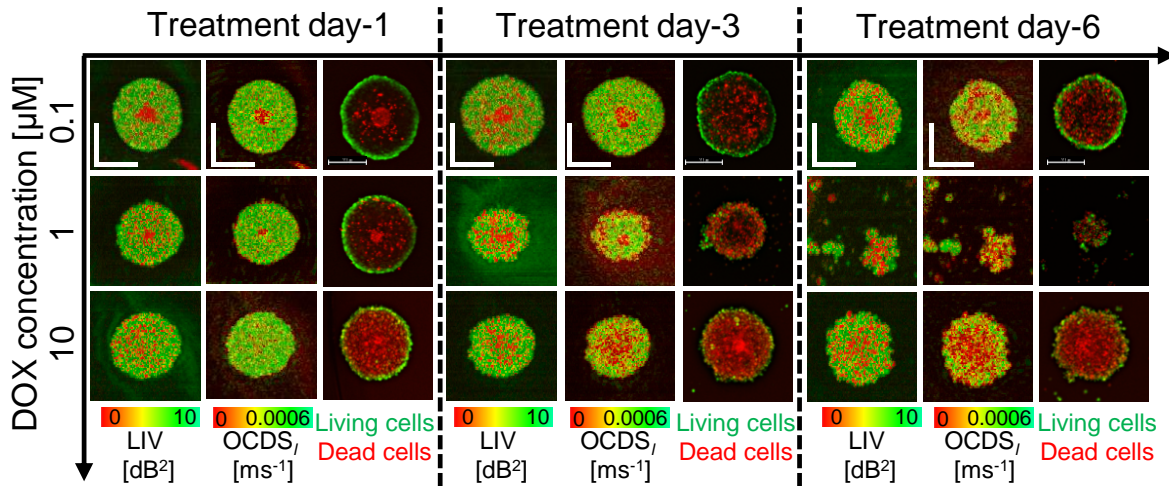

**Figure S9:** *En face* D-OCT and fluorescence images of another DOX-treated MCF-7 spheroids measured under each treatment condition. The results are similar to those presented in Fig. 5 of the main manuscript. Scale bars represent 200  $\mu\text{m}$ .

## References

1. I. Abd El-Sadek, R. Morishita, T. Mori, S. Makita, P. Mukherjee, S. Matsusaka, and Y. Yasuno "Human-derived tumor-spheroid-based anti-cancer drugs testing using dynamic optical coherence tomography", *Proc. SPIE* 12632, Optical Coherence Imaging Techniques and Imaging in Scattering Media V, 126321A (11 August 2023).
